# Supplementary material for: Long-term trends in aerosol properties derived from AERONET measurements
Source: Copernicus journal article supplement (doi:10.5194/acp-25-4617-2025), 2025-04-30
Supplement: Supplementary file 1 [file acp-25-4617-2025-supplement.zip]

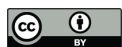

## *Supplement of*

# **Long-term trends in aerosol properties derived from AERONET measurements**

**Zhenyu Zhang et al.**

*Correspondence to:* Jing Li (jing-li@pku.edu.cn)

- acp-25-4617-2025-supplement-title-page.pdf
- supplementary-v5
  - README\_Sup.docx
  - list
    - \* AAOD.xls
    - \* AE.xls
    - \* AOD.xls
    - \* SSA.xls
  - map\_670\_nm
    - \* AAOD\_L15.eps
    - \* AAOD\_L15\_Seasonal.eps
    - \* AOD\_L2.eps
    - \* AOD\_L2\_Seasonal.eps
    - \* SSA\_L15.eps
    - \* SSA\_L15\_Seasonal.eps
  - map\_870\_nm
    - \* AAOD\_L15.eps
    - \* AAOD\_L15\_Seasonal.eps
    - \* AOD\_L2.eps
    - \* AOD\_L2\_Seasonal.eps
    - \* SSA\_L15.eps
    - \* SSA\_L15\_Seasonal.eps
  - map\_mean
    - \* AAOD\_Seasonal.eps
    - \* AAOD\_annual.eps
    - \* AE\_Seasonal.eps

- \* AE\_annual.eps
- \* AOD\_Seasonal.eps
- \* SSA\_Seasonal.eps
- \* SSA\_annual.eps
- time\_series
  - \* AAOD
  - \* AE
  - \* AOD
  - \* SSA

The copyright of individual parts of the supplement might differ from the article licence.
